# Supplementary material
Source: PubMed Central journal article supplement (PMC283522)

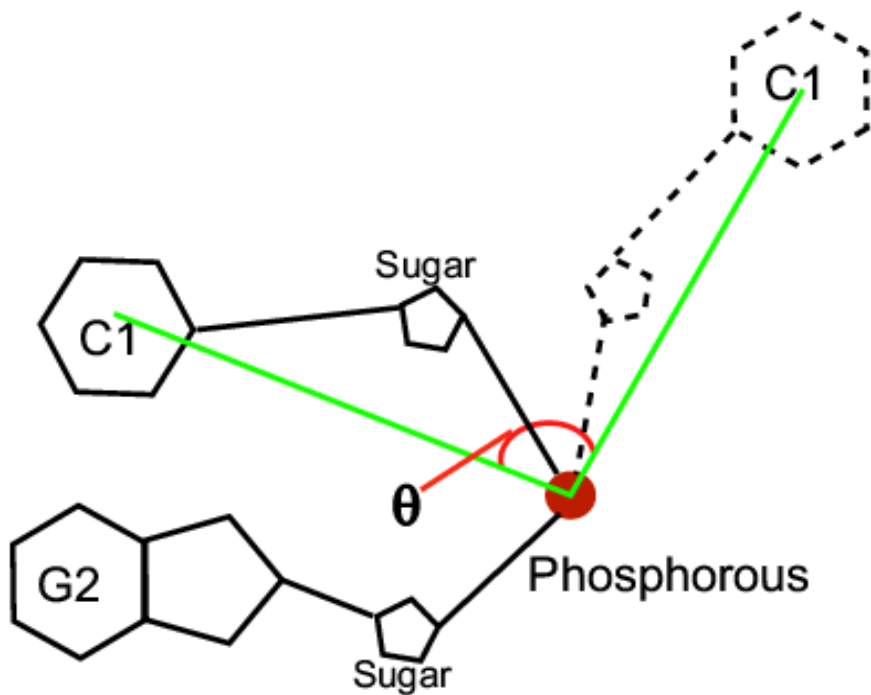

Supplement: pnas_100_24_13922__8.pdf [file pnas_100_24_13922__8.pdf]
